# Supplementary material for: Luteolin Targets the Toll-Like Receptor Signaling Pathway in Prevention of Hepatic and Adipocyte Fibrosis and Insulin Resistance in Diet-Induced Obese Mice
Source: PubMed Central journal article supplement (PMC6213163; doi:10.3390/nu10101415), 2018-10-03
Supplement: nutrients-10-01415-s001.pdf [file nutrients-10-01415-s001.pdf]

**Table S1.** Primer sequences used for RT-qPCR validation of the microarray data.

| Gene                                                                          | Primer direction | Primer sequence                  |
|-------------------------------------------------------------------------------|------------------|----------------------------------|
| Glyceraldehyde 3-phosphate dehydrogenase (Gapdh)                              | Forward          | 5'-AGGTCGGTGTGAACGGATTG-3'       |
|                                                                               | Reverse          | 5'-TGTAGACCATGTAGTTGAGGTCA-3'    |
| CD antigen 68 (Cd68)                                                          | Forward          | 5'-CCATCCTTCACGATGACACCT-3'      |
|                                                                               | Reverse          | 5'-GGCAGGGTTATGAGTGACAGTT-3'     |
| Chemokine (C-C motif) ligand (Ccl2, MCP-1)                                    | Forward          | 5'-ACTGAAGCCAGCTCTCTCTTCCTC-3'   |
|                                                                               | Reverse          | 5'-TTCCTTCTTGGGGTCAGCACAGAC-3'   |
| Egf-like module containing, mucin-like, hormone receptor-like 1 (Emr1, F4/80) | Forward          | 5'-CCCCAGTGTCTTACAGAGTG-3'       |
|                                                                               | Reverse          | 5'-GTGCCAGAGTGGATGTCT-3'         |
| Colony stimulating factor 1 receptor (Csf1r)                                  | Forward          | 5'-CCACCATCCACTTGTATGTCAAAGAT-3' |
|                                                                               | Reverse          | 5'-CTCAACCACTGTCACCTCCTGT-3'     |
| Serum amyloid A 3 (Saa3)                                                      | Forward          | 5'-GCCTGGGCTGCTAAAGTCAT-3'       |
|                                                                               | Reverse          | 5'-TGCTCCATGTCCCGTGAAC-3'        |

**Table S2.** The number of differentially expressed genes (DEGs) in the epididymal WAT of C57BL/6J mice.

|   | HFD vs. ND | LU vs. HFD |
|---|------------|------------|
| ▲ | 1038       | 188        |
| ▼ | 640        | 335        |

Differentially expressed genes based on comparison of HFD vs. ND and LU vs. HFD according to  $p$ -value < 0.05, fold change > 1.5 in the epididymal WAT depot.

▲: up-regulated genes, ▼: down-regulated genes.

**Table S3.** Effect of luteolin on transcriptional pattern of anti- and pro-inflammatory cytokine and chemokine genes in adipose tissue of C57BL/6J mice.

|                          | ND          | HFD            | LU             |
|--------------------------|-------------|----------------|----------------|
| <i>Chemokines</i>        |             |                |                |
| Ccl2 (MCP-1)             | 1.00 ± 0.04 | 2.12 ± 0.07*** | 1.29 ± 0.01§§§ |
| Ccl3 ((MIP-1 $\alpha$ )) | 1.00 ± 0.11 | 1.68 ± 0.07*** | 1.26 ± 0.02§§§ |
| Ccl4 (MIP-1 $\beta$ )    | 1.00 ± 0.01 | 2.09 ± 0.15*** | 1.33 ± 0.05§§  |
| Ccl5 (RANTES)            | 1.00 ± 0.06 | 1.41 ± 0.21*   | 1.07 ± 0.05§   |
| Ccl6 (MRP-1)             | 1.01 ± 0.19 | 1.57 ± 0.04**  | 0.91 ± 0.03§§§ |
| Ccl7 (MCP3)              | 1.01 ± 0.13 | 2.39 ± 0.33**  | 1.38 ± 0.04§§  |
| Ccl9 (MRP-2)             | 1.00 ± 0.09 | 2.41 ± 0.18*** | 1.42 ± 0.04§§§ |
| Ccl11 (Eotaxin)          | 1.00 ± 0.02 | 1.16 ± 0.11    | 0.89 ± 0.00§   |
| Ccr5                     | 1.00 ± 0.04 | 3.04 ± 0.43*** | 1.52 ± 0.05§§  |
| Cxcl1                    | 1.00 ± 0.08 | 1.70 ± 0.10*** | 1.32 ± 0.02§§  |
| Cxcl9                    | 1.00 ± 0.06 | 0.60 ± 0.02**  | 0.73 ± 0.02§   |
| Cxcl16                   | 1.00 ± 0.03 | 1.67 ± 0.10**  | 1.34 ± 0.02§   |
| Cxcr4                    | 1.01 ± 0.15 | 1.48 ± 0.08**  | 0.91 ± 0.02§   |
| <i>Interleukines</i>     |             |                |                |
| Il1a                     | 1.00 ± 0.03 | 1.19 ± 0.04*   | 1.13 ± 0.06    |
| Il1rn                    | 1.00 ± 0.04 | 3.68 ± 0.37**  | 2.28 ± 0.06§   |
| Il7                      | 1.00 ± 0.06 | 1.27 ± 0.02*   | 1.03 ± 0.01§§§ |
| Il7r                     | 1.00 ± 0.06 | 6.51 ± 0.60*** | 3.34 ± 0.23§§  |

|                        |             |               |                            |
|------------------------|-------------|---------------|----------------------------|
| Il10ra                 | 1.00 ± 0.04 | 1.56 ± 0.06** | 1.26 ± 0.02 <sup>ss</sup>  |
| Il10rb                 | 1.00 ± 0.01 | 1.52 ± 0.04** | 1.37 ± 0.09                |
| Il13ra1                | 1.00 ± 0.04 | 1.24 ± 0.01** | 0.86 ± 0.02 <sup>sss</sup> |
| Il13ra2                | 1.00 ± 0.04 | 1.85 ± 0.13** | 1.43 ± 0.03 <sup>s</sup>   |
| Il15                   | 1.00 ± 0.02 | 1.31 ± 0.04** | 1.24 ± 0.02                |
| Il15ra                 | 1.00 ± 0.06 | 0.64 ± 0.01** | 0.87 ± 0.03 <sup>sss</sup> |
| <b>Other cytokines</b> |             |               |                            |
| Tnf                    | 1.00 ± 0.02 | 1.30 ± 0.05** | 1.24 ± 0.05                |
| Tnfrsf1b               | 1.00 ± 0.03 | 1.82 ± 0.09** | 1.23 ± 0.01 <sup>ss</sup>  |
| Tnfrsf11a              | 1.00 ± 0.02 | 1.33 ± 0.04** | 1.07 ± 0.06 <sup>s</sup>   |
| Tnfrsf11b              | 1.01 ± 0.10 | 1.02 ± 0.05   | 0.54 ± 0.02 <sup>sss</sup> |
| Tnfrsf12a              | 1.00 ± 0.04 | 1.31 ± 0.03** | 1.02 ± 0.04 <sup>ss</sup>  |
| Tnfrsf13b              | 1.00 ± 0.04 | 1.45 ± 0.05** | 1.11 ± 0.04 <sup>ss</sup>  |
| Tnfrsf21               | 1.00 ± 0.06 | 1.78 ± 0.04** | 1.53 ± 0.03 <sup>s</sup>   |
| Tnfrsf22               | 1.00 ± 0.04 | 1.30 ± 0.03** | 1.03 ± 0.02 <sup>ss</sup>  |
| Adam8                  | 1.00 ± 0.02 | 2.80 ± 0.20** | 1.76 ± 0.03 <sup>ss</sup>  |
| Casp1 (Ice)            | 1.00 ± 0.03 | 2.40 ± 0.04** | 1.71 ± 0.03 <sup>sss</sup> |
| Casp4                  | 1.00 ± 0.03 | 1.35 ± 0.04** | 1.09 ± 0.03 <sup>ss</sup>  |
| Csf1r                  | 1.00 ± 0.05 | 1.83 ± 0.09** | 1.23 ± 0.09 <sup>ss</sup>  |
| Csf2ra                 | 1.00 ± 0.03 | 2.09 ± 0.13** | 1.55 ± 0.09 <sup>s</sup>   |
| Csf2rb2                | 1.00 ± 0.01 | 2.00 ± 0.13** | 1.58 ± 0.03 <sup>s</sup>   |
| Saa3                   | 1.00 ± 0.02 | 9.44 ± 1.09** | 5.78 ± 0.61 <sup>s</sup>   |
| Emr1                   | 1.00 ± 0.02 | 2.93 ± 0.12** | 1.21 ± 0.00 <sup>sss</sup> |
| Pycard                 | 1.00 ± 0.04 | 1.39 ± 0.01** | 1.12 ± 0.04 <sup>ss</sup>  |

Data shown as means ± S.E. ND vs HFD: \*  $p < 0.05$ , \*\*  $p < 0.01$ , \*\*\*  $p < 0.001$ . HFD vs LU: §  $p < 0.05$ , §§  $p < 0.01$ , §§§  $p < 0.001$ . Ccl, chemokine (C-C motif) ligand; Ccr, chemokine (C-C motif) receptor; Cxcl, chemokine (C-X-C motif) ligand; Cxcr, chemokine (C-X-C motif) receptor, Il1rn, interleukin 1 receptor antagonist; Il, interleukin; Ilr, interleukin receptor; Tnf, tumor necrosis factor; Tnfrsf, tumor necrosis factor receptor; Adam8, a disintegrin and metalloproteinase domain 8; Casp, caspase; Csf, colony stimulating factor receptor; Saa, serum amyloid A; Emr1, egf-like module containing, mucin-like, hormone receptor-like 1; Pycard, PYD and CARD domain containing.

**Table S4.** Effect of luteolin on transcriptional pattern of toll-like receptors (TLRs), interferon regulatory factors (IRFs) and Cd antigen 14 (Cd14) in adipose tissue and liver of C57BL/6J mice.

|       | ND          | HFD           | LU                         |
|-------|-------------|---------------|----------------------------|
| Tlr1  | 1.00 ± 0.04 | 2.23 ± 0.06** | 1.74 ± 0.01 <sup>ss</sup>  |
| Tlr2  | 1.00 ± 0.04 | 1.66 ± 0.04** | 1.17 ± 0.02 <sup>sss</sup> |
| Tlr4  | 1.00 ± 0.04 | 1.15 ± 0.04   | 0.82 ± 0.02 <sup>ss</sup>  |
| Tlr5  | 1.01 ± 0.05 | 1.04 ± 0.03   | 1.25 ± 0.02 <sup>ss</sup>  |
| Tlr6  | 1.00 ± 0.03 | 1.61 ± 0.03** | 1.31 ± 0.02 <sup>sss</sup> |
| Tlr7  | 1.00 ± 0.06 | 1.78 ± 0.04** | 1.10 ± 0.00 <sup>sss</sup> |
| Tlr8  | 1.01 ± 0.07 | 2.21 ± 0.09** | 1.29 ± 0.02 <sup>sss</sup> |
| Tlr13 | 1.00 ± 0.06 | 5.05 ± 0.46** | 2.66 ± 0.16 <sup>ss</sup>  |
| Irf5  | 1.00 ± 0.04 | 2.21 ± 0.09** | 1.55 ± 0.05 <sup>ss</sup>  |
| Irf8  | 1.00 ± 0.06 | 1.91 ± 0.13** | 1.51 ± 0.05 <sup>s</sup>   |
| Cd14  | 1.01 ± 0.08 | 1.10 ± 0.02   | 0.69 ± 0.01 <sup>sss</sup> |

Data shown as means ± S.E. ND vs HFD: \*  $p < 0.05$ , \*\*  $p < 0.01$ , \*\*\*  $p < 0.001$ . HFD vs LU: §  $p < 0.05$ , §§  $p < 0.01$ , §§§  $p < 0.001$ .

**Table S5.** Effect of luteolin on transcriptional pattern of Cd antigen families in adipose tissue and liver of C57BL/6J mice.

|        | ND          | HFD            | LU             |
|--------|-------------|----------------|----------------|
| Cd6    | 1.00 ± 0.01 | 1.34 ± 0.08*   | 1.02 ± 0.01§   |
| Cd9    | 1.00 ± 0.02 | 2.35 ± 0.17**  | 1.39 ± 0.05§§  |
| Cd14   | 1.01 ± 0.09 | 1.10 ± 0.02    | 0.69 ± 0.01§§§ |
| Cd22   | 1.00 ± 0.05 | 1.45 ± 0.04**  | 1.26 ± 0.03§   |
| Cd33   | 1.00 ± 0.05 | 1.01 ± 0.02    | 0.78 ± 0.02§§§ |
| Cd36   | 1.00 ± 0.04 | 1.05 ± 0.05    | 1.59 ± 0.04§§§ |
| Cd37   | 1.00 ± 0.04 | 1.53 ± 0.09**  | 1.16 ± 0.02§   |
| Cd40   | 1.01 ± 0.08 | 1.47 ± 0.07*   | 1.25 ± 0.02§   |
| Cd44   | 1.00 ± 0.01 | 3.42 ± 0.24*** | 1.67 ± 0.06§§  |
| Cd52   | 1.00 ± 0.06 | 2.38 ± 0.14*** | 1.42 ± 0.01§§  |
| Cd53   | 1.00 ± 0.07 | 2.42 ± 0.19**  | 1.51 ± 0.16§   |
| Cd68   | 1.01 ± 0.12 | 4.90 ± 0.43*** | 2.42 ± 0.05§§  |
| Cd72   | 1.00 ± 0.03 | 4.15 ± 0.40*** | 2.43 ± 0.11§   |
| Cd74   | 1.00 ± 0.07 | 1.68 ± 0.05*** | 1.10 ± 0.02§§§ |
| Cd83   | 1.01 ± 0.09 | 1.48 ± 0.11*   | 0.88 ± 0.03§§  |
| Cd84   | 1.01 ± 0.08 | 4.79 ± 0.34*** | 2.60 ± 0.04§§  |
| Cd86   | 1.00 ± 0.03 | 1.08 ± 0.01    | 0.83 ± 0.01§§§ |
| Cd93   | 1.00 ± 0.03 | 1.41 ± 0.03*** | 1.12 ± 0.03§§  |
| Cd163  | 1.00 ± 0.05 | 0.69 ± 0.05*   | 0.53 ± 0.01§   |
| Cd180  | 1.00 ± 0.02 | 3.10 ± 0.29**  | 1.74 ± 0.03§§  |
| Cd209a | 1.00 ± 0.03 | 0.87 ± 0.03*   | 0.66 ± 0.01§§  |
| Cd209b | 1.01 ± 0.07 | 0.65 ± 0.02**  | 0.37 ± 0.01§§§ |
| Cd248  | 1.00 ± 0.03 | 1.20 ± 0.09    | 0.78 ± 0.01§§  |
| Cd276  | 1.01 ± 0.07 | 1.79 ± 0.06*** | 1.35 ± 0.03§§  |

Data shown as means ± S.E. ND vs HFD: \*  $p < 0.05$ , \*\*  $p < 0.01$ , \*\*\*  $p < 0.001$ . HFD vs LU: §  $p < 0.05$ , §§  $p < 0.01$ , §§§  $p < 0.001$ .

**Table S6.** Effect of luteolin on transcriptional pattern of collagen in adipose tissue and liver of C57BL/6J mice.

|         | ND          | HFD            | LU             |
|---------|-------------|----------------|----------------|
| Col1a1  | 1.01 ± 0.08 | 2.03 ± 0.14**  | 1.26 ± 0.02§§  |
| Col1a2  | 1.00 ± 0.03 | 1.40 ± 0.05**  | 0.97 ± 0.04§§  |
| Col3a1  | 1.01 ± 0.09 | 2.64 ± 0.10*** | 1.55 ± 0.05§§§ |
| Col4a1  | 1.00 ± 0.05 | 1.34 ± 0.06*   | 1.07 ± 0.05§   |
| Col4a2  | 1.00 ± 0.05 | 1.69 ± 0.08**  | 1.40 ± 0.03§   |
| Col4a5  | 1.01 ± 0.11 | 1.27 ± 0.03    | 0.85 ± 0.01§§§ |
| Col5a2  | 1.00 ± 0.05 | 1.46 ± 0.10*   | 1.08 ± 0.05§   |
| Col6a1  | 1.00 ± 0.06 | 1.68 ± 0.06*** | 1.34 ± 0.03§§  |
| Col6a2  | 1.01 ± 0.12 | 1.95 ± 0.09**  | 1.62 ± 0.05§   |
| Col6a3  | 1.00 ± 0.07 | 1.74 ± 0.11**  | 1.19 ± 0.02§§  |
| Col8a1  | 1.00 ± 0.05 | 1.42 ± 0.07**  | 1.00 ± 0.01§§  |
| Col9a3  | 1.00 ± 0.04 | 1.62 ± 0.05*** | 1.59 ± 0.08    |
| Col12a1 | 1.00 ± 0.06 | 3.27 ± 0.04*** | 2.13 ± 0.05§§§ |
| Col14a1 | 1.00 ± 0.05 | 1.07 ± 0.06    | 0.65 ± 0.01§§  |
| Col16a1 | 1.02 ± 0.14 | 2.32 ± 0.04*** | 2.47 ± 0.09    |

Data shown as means ± S.E. ND vs HFD: \*  $p < 0.05$ , \*\*  $p < 0.01$ , \*\*\*  $p < 0.001$ . HFD vs LU: §  $p < 0.05$ , §§  $p < 0.01$ , §§§  $p < 0.001$ .

**Table S7.** Effect of luteolin on transcriptional pattern of extracellular matrix (ECM)'s regulator in adipose tissue and liver of C57BL/6J mice.

|      | ND          | HFD            | LU            |
|------|-------------|----------------|---------------|
| Cd44 | 1.00 ± 0.01 | 3.42 ± 0.23*** | 1.67 ± 0.06§§ |

|       |             |                 |                            |
|-------|-------------|-----------------|----------------------------|
| Lum   | 1.02 ± 0.14 | 2.21 ± 0.10**   | 0.93 ± 0.02 <sup>sss</sup> |
| Mmp2  | 1.02 ± 0.14 | 1.86 ± 0.10**   | 1.11 ± 0.02 <sup>ss</sup>  |
| Mmp3  | 1.00 ± 0.01 | 1.62 ± 0.05***  | 0.93 ± 0.06 <sup>sss</sup> |
| Mmp9  | 1.01 ± 0.11 | 0.61 ± 0.01*    | 0.62 ± 0.02                |
| Mmp12 | 1.01 ± 0.08 | 15.14 ± 1.43*** | 9.85 ± 0.73 <sup>s</sup>   |
| Mmp13 | 1.01 ± 0.09 | 2.03 ± 0.19**   | 1.44 ± 0.11 <sup>s</sup>   |
| Tgfb1 | 1.00 ± 0.02 | 1.49 ± 0.02***  | 1.19 ± 0.02 <sup>sss</sup> |
| Tgfbi | 1.00 ± 0.01 | 1.20 ± 0.04*    | 0.76 ± 0.00 <sup>sss</sup> |

Data shown as means ± S.E. ND vs HFD: \**p* < 0.05, \*\**p* < 0.01, \*\*\**p* < 0.001. HFD vs LU: §*p* < 0.05, §§*p* < 0.01, sss*p* < 0.001. Cd44, CD antigen 44; Lum, lumican; Mmp, matrix metalloproteinases; Tgfb, transforming growth factor beta.

**Table S8.** Effect of luteolin on transcriptional pattern of cathepsin in adipose tissue and liver of C57BL/6J mice.

|         | ND          | HFD            | LU                         |
|---------|-------------|----------------|----------------------------|
| Ctsa    | 1.01 ± 0.09 | 2.40 ± 0.12*** | 1.60 ± 0.02 <sup>ss</sup>  |
| Ctsc    | 1.00 ± 0.06 | 1.17 ± 0.03    | 0.86 ± 0.01 <sup>sss</sup> |
| Ctsd    | 1.00 ± 0.03 | 1.43 ± 0.01*** | 1.40 ± 0.04                |
| Ctsh    | 1.00 ± 0.02 | 0.63 ± 0.02*** | 0.92 ± 0.03 <sup>sss</sup> |
| Ctsk    | 1.01 ± 0.07 | 4.60 ± 0.32*** | 2.58 ± 0.09 <sup>ss</sup>  |
| Ctsl    | 1.00 ± 0.02 | 1.82 ± 0.10*** | 1.23 ± 0.05 <sup>ss</sup>  |
| Ctss    | 1.01 ± 0.11 | 3.74 ± 0.15*** | 2.63 ± 0.12 <sup>ss</sup>  |
| Ctsz    | 1.01 ± 0.07 | 1.58 ± 0.10**  | 1.61 ± 0.08                |
| Col12a1 | 1.00 ± 0.06 | 3.27 ± 0.04*** | 2.13 ± 0.05 <sup>sss</sup> |
| Col14a1 | 1.00 ± 0.05 | 1.07 ± 0.06    | 0.65 ± 0.01 <sup>ss</sup>  |
| Col16a1 | 1.02 ± 0.14 | 2.32 ± 0.04*** | 2.47 ± 0.09                |

Data shown as means ± S.E. ND vs HFD: \**p* < 0.05, \*\**p* < 0.01, \*\*\**p* < 0.001. HFD vs LU: §*p* < 0.05, §§*p* < 0.01, sss*p* < 0.001. Cts, Cathpsin.

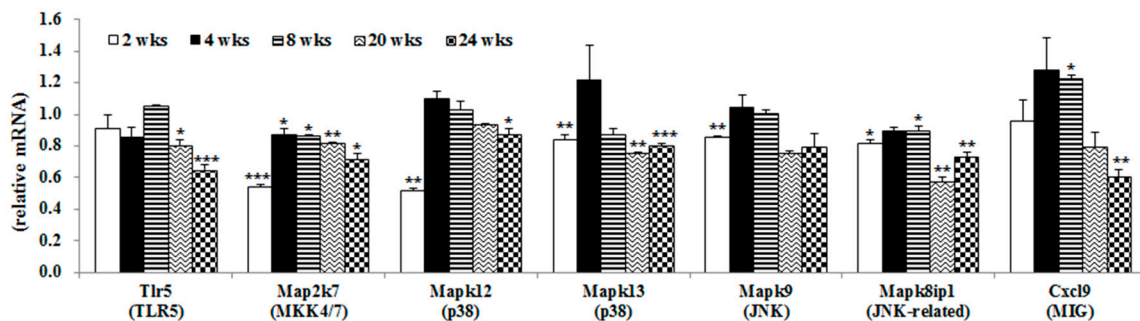

**Figure S1.** Effect of high-fat feeding on transcription of TLR5, MKK4/7, p38, JNK and MIG-related genes in epididymal adipose tissue of C57BL/6 J mice over 24 weeks (HFD vs. ND group). Data shown as means ± S.D. \**p* < 0.05 based on wilcoxon t-test. ND: normal diet. HFD: high-fat diet.
